# Supplementary material for: Partitioning anthropogenic and natural methane emissions in Finland during 2000–2021 by combining bottom-up and top-down estimates
Source: Copernicus journal article supplement (doi:10.5194/egusphere-2024-1953), 2024-07-29
Supplement: Supplementary file 1 [file egusphere-2024-1953-supplement.pdf]

# Supplement of Partitioning anthropogenic and natural methane emissions in Finland during 2000–2021 by combining bottom-up and top-down estimates

Maria K. Tenkanen<sup>1</sup>, Aki Tsuruta<sup>1</sup>, Hugo Denier van der Gon<sup>2</sup>, Lena Höglund-Isaksson<sup>3</sup>, Antti Leppänen<sup>1,4</sup>, Tiina Markkanen<sup>1</sup>, Ana Maria Roxana Petrescu<sup>5</sup>, Maarit Raivonen<sup>4</sup>, and Tuula Aalto<sup>1</sup>

<sup>1</sup>Climate Research, Finnish Meteorological Institute, 00560 Helsinki, Finland

<sup>2</sup>Department of Air Quality and Emissions Research, TNO, 3584 CB Utrecht, the Netherlands

<sup>3</sup>International Institute for Applied Systems Analysis (IIASA), 2361 Laxenburg, Austria

<sup>4</sup>Institute for Atmospheric and Earth System Research/Physics, Faculty of Science, University of Helsinki, 00014 Helsinki, Finland

<sup>5</sup>Department of Earth Sciences, Vrije Universiteit Amsterdam, 1081HV, Amsterdam, the Netherlands

**Correspondence:** Maria K. Tenkanen (maria.tenkanen@fmi.fi)

**Table S1.** Continuation to the Table 1 "List of inversion setups".

| Inversion         | Termite prior         | Ocean prior           | Other priors                     | Atmospheric sink         |
|-------------------|-----------------------|-----------------------|----------------------------------|--------------------------|
| InvJSBACH_CAMSREG | VISIT                 | Tsuruta et al. (2017) |                                  | ECHAM5/MESSy1            |
| InvLPX_CAMSREG    | VISIT                 | Tsuruta et al. (2017) |                                  | ECHAM5/MESSy1            |
| InvLPX_EDGAR      | VISIT                 | Weber et al. (2019)   |                                  | ECHAM5/MESSy1            |
| InvLPX_EDGAR_UNC  | VISIT                 | Weber et al. (2019)   |                                  | ECHAM5/MESSy1            |
| InvGCP_EDGAR      | Saunois et al. (2020) | Weber et al. (2019)   | Geological: Etiope et al. (2019) | Brühl and Crutzen (1993) |

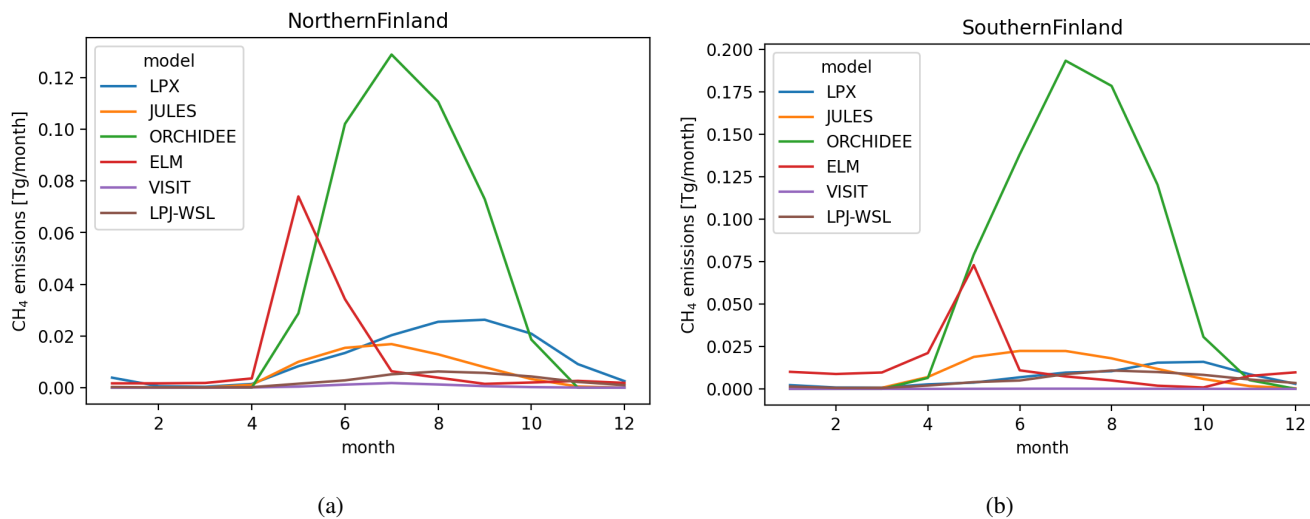

**Figure S1.** Average monthly CH<sub>4</sub> emissions of process-based models from Saunio et al. (2020) in a) northern and b) southern Finland.

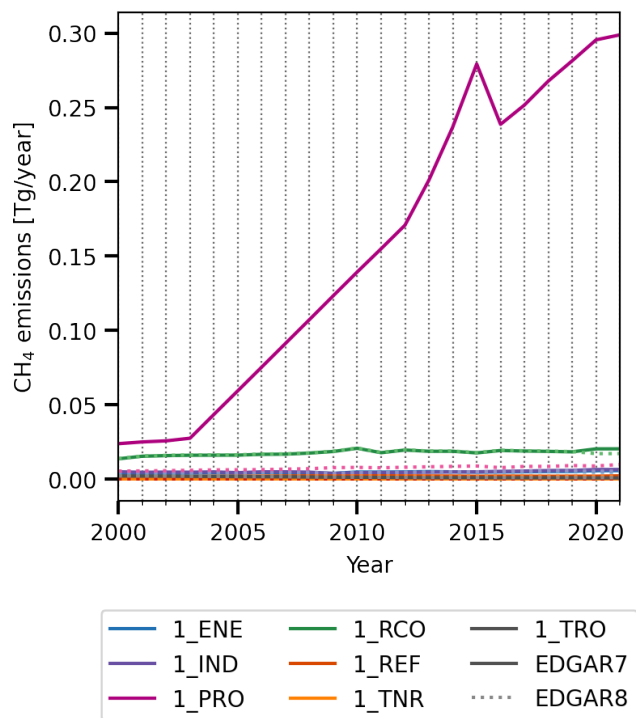

**Figure S2.** Annual energy sector CH<sub>4</sub> emissions by its components from EDGAR v7 (solid line) and v8 (dotted line).

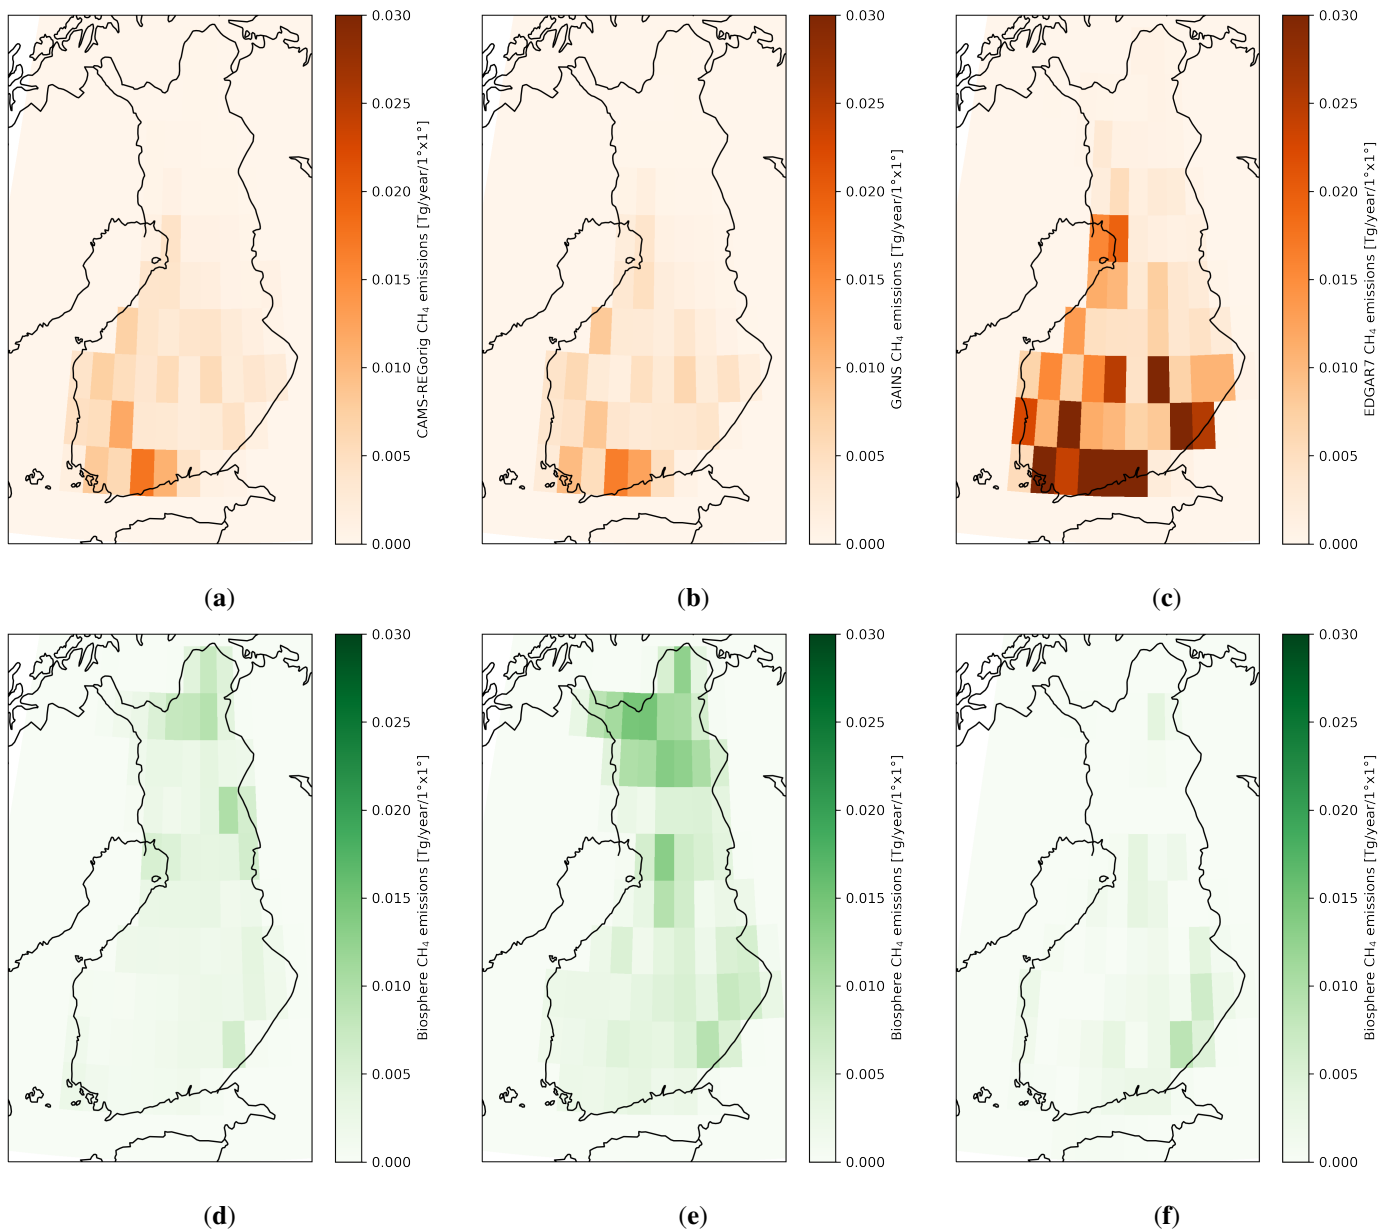

**Figure S3.** Average annual  $\text{CH}_4$  emissions from 2010–2020 of (a) CAMS-REG (orig), (b) GAINS, (c) EDGAR v7, (d) LPX-Bern DYPTOP, (e) JSBACH-HIMMELI and (f) GCP biospheric prior.

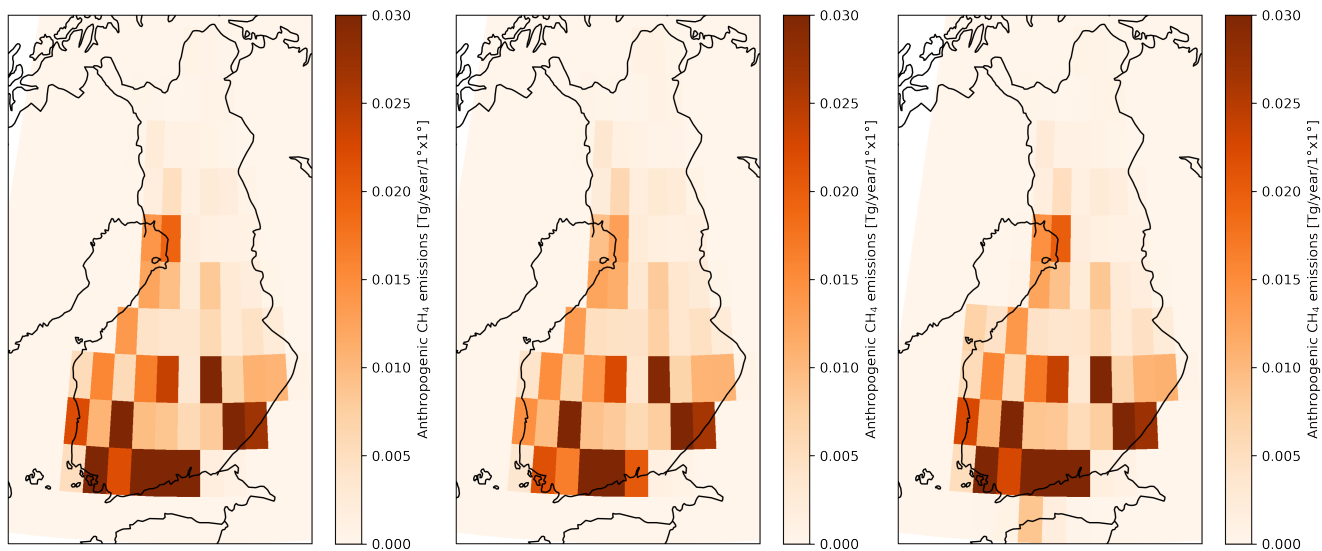

(a) InVLPX\_EDGAR

(b) InVLPX\_EDGAR\_UNC

(c) InVGCP\_EDGAR

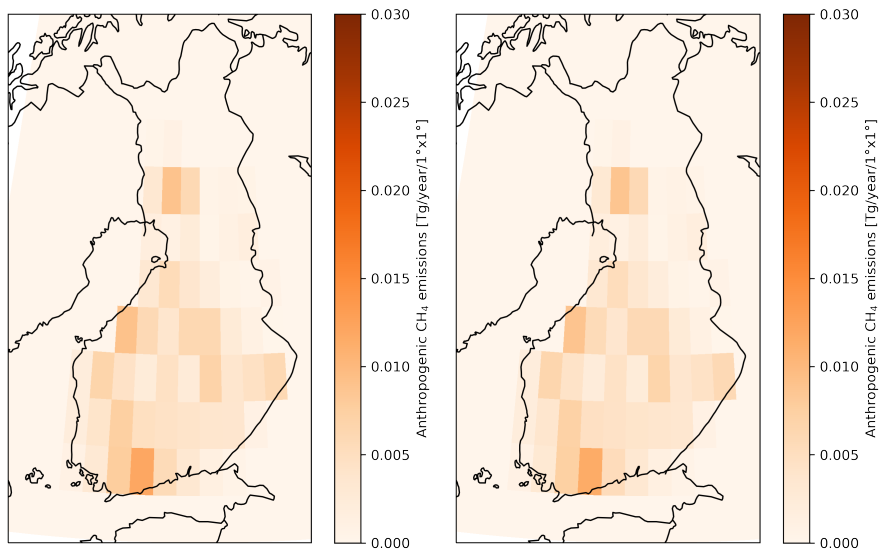

(d) InVLPX\_CAMSREG

(e) InVJSBACH\_CAMSREG

**Figure S4.** Average optimised annual anthropogenic CH<sub>4</sub> emissions from 2010–2020 from (a) InVLPX\_EDGAR, (b) InVLPX\_EDGAR\_UNC, (c) InVGCP\_EDGAR, (d) InVLPX\_CAMSREG and (e) InVJSBACH\_CAMSREG

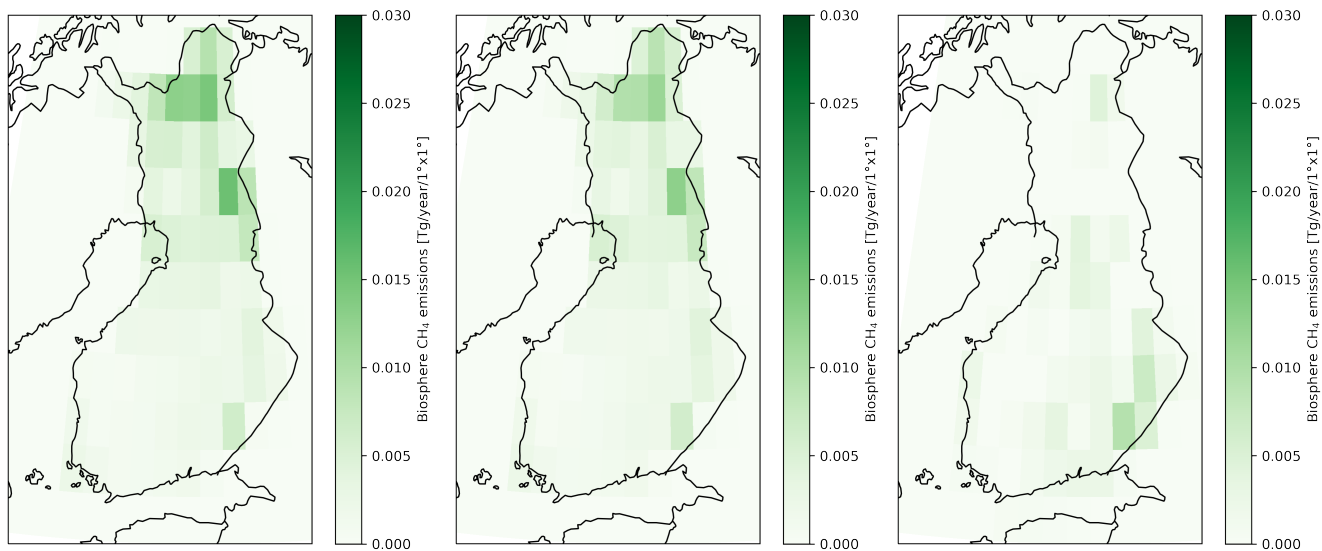

(a) InVLPX\_EDGAR

(b) InVLPX\_EDGAR\_UNC

(c) InVGCP\_EDGAR

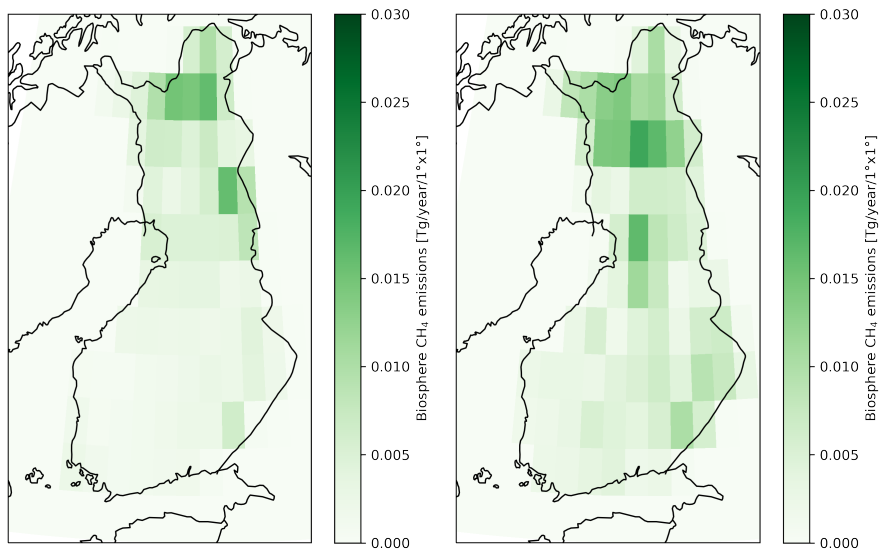

(d) InVLPX\_CAMSREG

(e) InVJSBACH\_CAMSREG

**Figure S5.** Average optimised annual natural CH<sub>4</sub> emissions from 2010–2020 from (a) InVLPX\_EDGAR, (b) InVLPX\_EDGAR\_UNC, (c) InVGCP\_EDGAR, (d) InVLPX\_CAMSREG and (e) InVJSBACH\_CAMSREG

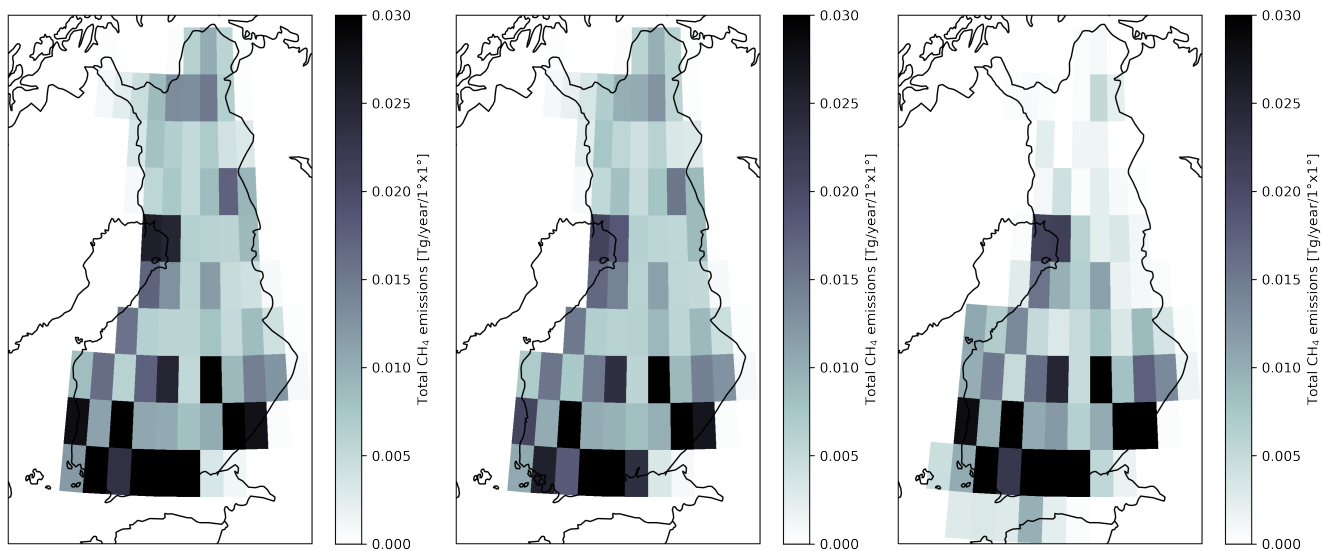

(a) InvLPX\_EDGAR

(b) InvLPX\_EDGAR\_UNC

(c) InvGCP\_EDGAR

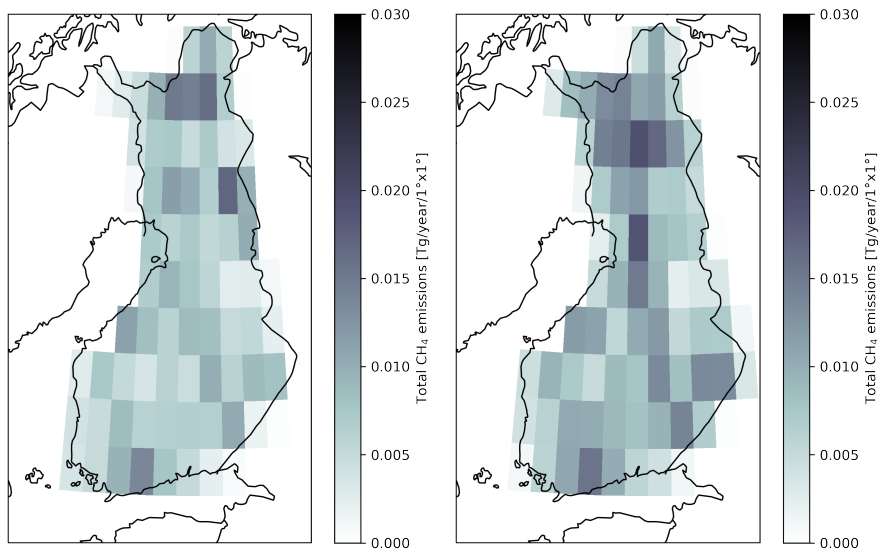

(d) InvLPX\_CAMSREG

(e) InvJSBACH\_CAMSREG

**Figure S6.** Average optimised annual total CH<sub>4</sub> emissions from 2010–2020 from (a) InvLPX\_EDGAR, (b) InvLPX\_EDGAR\_UNC, (c) InvGCP\_EDGAR, (d) InvLPX\_CAMSREG and (e) InvJSBACH\_CAMSREG

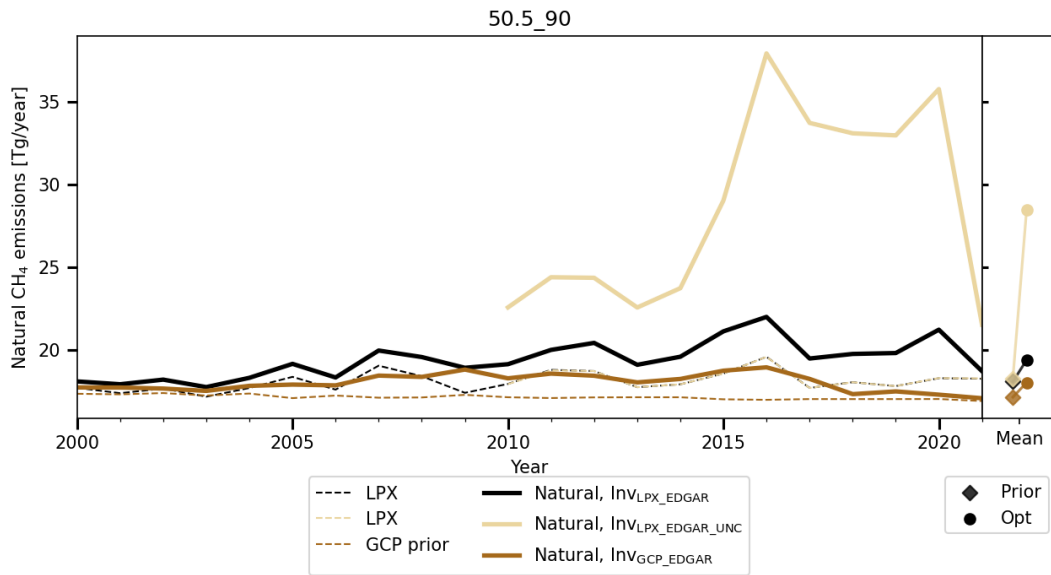

**Figure S7.** Annual natural CH<sub>4</sub> emission estimates from three CTE-CH<sub>4</sub> inversion model runs in latitudes northern than 50° N. Prior estimates are shown with dashed and optimised estimates with solid lines. The right panel shows the mean prior and optimised estimates from the whole study period.

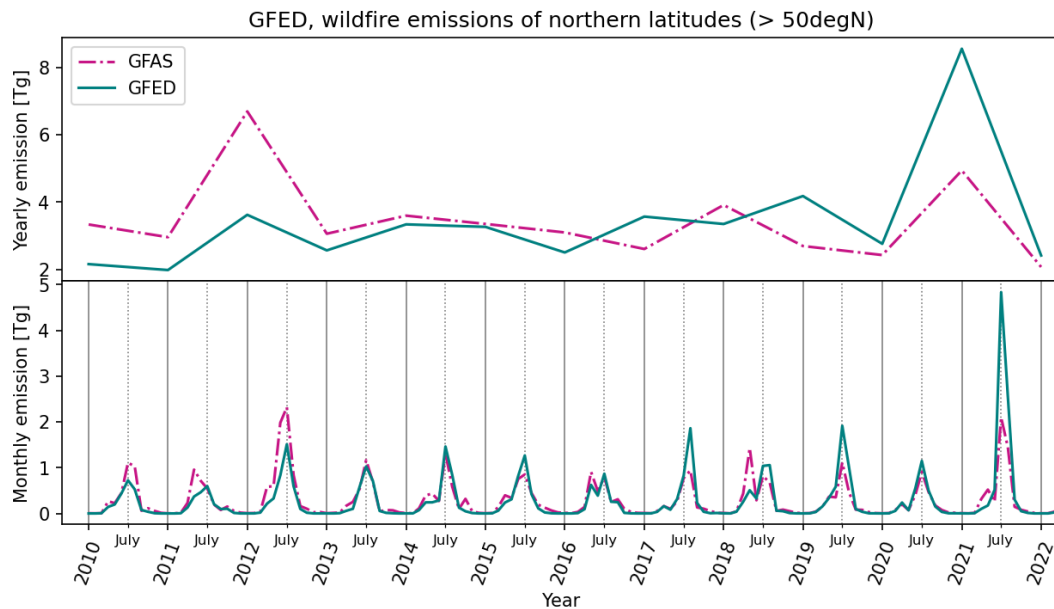

**Figure S8.** Annual (top) and monthly (bottom) CH<sub>4</sub> emissions from GFAS (dashed line) and GFED (solid line) in latitudes northern than 50° N.

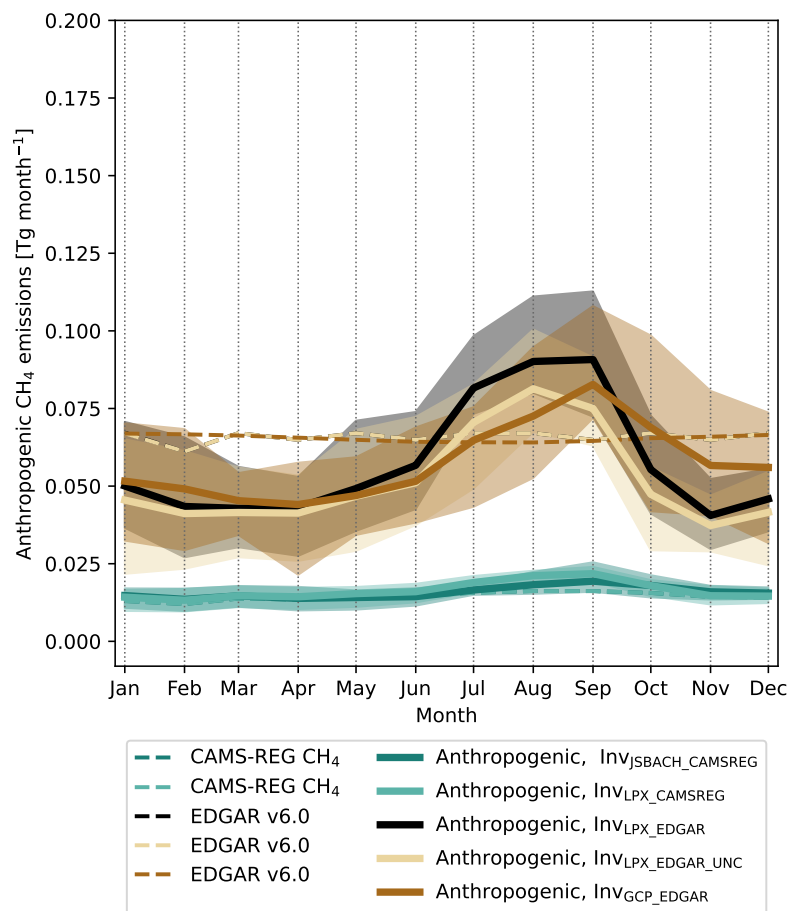

**Figure S9.** Average monthly anthropogenic CH<sub>4</sub> emission estimates from the five CTE-CH<sub>4</sub> inversion model runs in Finland in 2010–2020. Prior estimates are shown with dashed and optimised estimates with solid lines. The shaded areas show the smallest and the largest monthly posterior emission estimates.



|               |                                     |      |      |      |             |      |      |      |
|---------------|-------------------------------------|------|------|------|-------------|------|------|------|
| Inversion run | Prior Inv <sub>JSBACH_CAMSREG</sub> | 2.67 | 1.33 | 2.33 | 2.67        | 2.33 | 2.33 | 2.28 |
|               | Prior Inv <sub>LPX_CAMSREG</sub>    | 2.33 | 2.33 | 2.67 | 3.00        | 2.67 | 2.67 | 2.61 |
|               | Prior Inv <sub>LPX_EDGAR</sub>      | 4.00 | 4.00 | 4.00 | 3.33        | 4.00 | 3.67 | 3.83 |
|               | Prior Inv <sub>GCP_EDGAR</sub>      | 1.00 | 2.33 | 1.00 | 1.00        | 1.00 | 1.33 | 1.28 |
|               |                                     | UTO  | KMP  | PUI  | SMR<br>Site | PAL  | SOD  | Mean |

**Figure S10.** The average rank calculated for each site for each forward run (with prior emissions) is shown. The bias, the detrended RMSE and the detrended R were calculated with each forward run in each site and values were then ranked between the model estimates (the smallest being the best with bias and RMSE and the highest being the best with R). Additionally, the right-most column is the average over all sites averages.

## References

- Brühl, C. and Crutzen, P. J.: MPIC two-dimensional model, Tech. rep., NASA, Washington, DC, 1993.
- Etiopie, G., Ciotoli, G., Schwietzke, S., and Schoell, M.: Gridded maps of geological methane emissions and their isotopic signature, *Earth System Science Data*, 11, 1–22, <https://doi.org/10.5194/essd-11-1-2019>, 2019.
- 5 Saunois, M., Stavert, A. R., Poulter, B., Bousquet, P., Canadell, J. G., Jackson, R. B., Raymond, P. A., Dlugokencky, E. J., Houweling, S., Patra, P. K., Ciais, P., Arora, V. K., Bastviken, D., Bergamaschi, P., Blake, D. R., Brailsford, G., Bruhwiler, L., Carlson, K. M., Carrol, M., Castaldi, S., Chandra, N., Crevoisier, C., Crill, P. M., Covey, K., Curry, C. L., Etiopie, G., Frankenberg, C., Gedney, N., Hegglin, M. I., Höglund-Isaksson, L., Hugelius, G., Ishizawa, M., Ito, A., Janssens-Maenhout, G., Jensen, K. M., Joos, F., Kleinen, T., Krummel, P. B., Langenfelds, R. L., Laruelle, G. G., Liu, L., Machida, T., Maksyutov, S., McDonald, K. C., McNorton, J., Miller, P. A., Melton, 10 J. R., Morino, I., Müller, J., Murguía-Flores, F., Naik, V., Niwa, Y., Noce, S., O’Doherty, S., Parker, R. J., Peng, C., Peng, S., Peters, G. P., Prigent, C., Prinn, R., Ramonet, M., Regnier, P., Riley, W. J., Rosentreter, J. A., Segers, A., Simpson, I. J., Shi, H., Smith, S. J., Steele, L. P., Thornton, B. F., Tian, H., Tohjima, Y., Tubiello, F. N., Tsuruta, A., Viovy, N., Voulgarakis, A., Weber, T. S., van Weele, M., van der Werf, G. R., Weiss, R. F., Worthy, D., Wunch, D., Yin, Y., Yoshida, Y., Zhang, W., Zhang, Z., Zhao, Y., Zheng, B., Zhu, Q., Zhu, Q., and Zhuang, Q.: The Global Methane Budget 2000–2017, *Earth System Science Data*, 12, 1561–1623, <https://doi.org/10.5194/essd-12-1561-2020>, 15 2020.
- Tsuruta, A., Aalto, T., Backman, L., Hakkarainen, J., van der Laan-Luijkx, I. T., Krol, M. C., Spahni, R., Houweling, S., Laine, M., Dlugokencky, E., Gomez-Pelaez, A. J., van der Schoot, M., Langenfelds, R., Ellul, R., Arduini, J., Apadula, F., Gerbig, C., Feist, D. G., Kivi, R., Yoshida, Y., and Peters, W.: Global methane emission estimates for 2000–2012 from CarbonTracker Europe-CH4 v1.0, *Geoscientific Model Development*, 10, 1261–1289, <https://doi.org/10.5194/gmd-10-1261-2017>, 2017.
- 20 Weber, T., Wiseman, N. A., and Kock, A.: Global ocean methane emissions dominated by shallow coastal waters, *Nature Communications*, 10, 4584, <https://doi.org/10.1038/s41467-019-12541-7>, 2019.
